# Supplementary material
Source: PubMed Central journal article supplement (PMC5103008)
Supplement: mmc1.pdf [file mmc1.pdf]

**Biophysical Journal, Volume 111**

**Supplemental Information**

**Influence of Ganglioside GM1 Concentration on Lipid Clustering and  
Membrane Properties and Curvature**

**Dhilon S. Patel, Soohyung Park, Emilia L. Wu, Min Sun Yeom, Göran Widmalm, Jeffery B. Klauda, and Wonpil Im**

## TABLES

**Table S1.** Details of sizes and compositions of all systems.

| System                   | % GM1 | Temp | System Info. |        |            |         |                                     |
|--------------------------|-------|------|--------------|--------|------------|---------|-------------------------------------|
|                          |       |      | # GM1        | # POPC | # Replicas | # Atoms | Initial Box size ( $\text{\AA}^3$ ) |
| GM1 <sup>10%</sup>       | 10    | 293  | 20           | 180    | 5          | ~66,000 | 80×80×95                            |
| GM1 <sup>20%</sup>       | 20    | 293  | 40           | 160    | 5          | ~66,000 | 80×80×95                            |
| GM1 <sup>30%</sup>       | 30    | 293  | 60           | 140    | 5          | ~65,000 | 82×82×90                            |
| GM1 <sup>10%B</sup>      | 10    | 293  | 80           | 720    | 1          | 260,960 | 156×156×102                         |
| GM1 <sup>20%B</sup>      | 20    | 293  | 160          | 640    | 1          | 260,640 | 151×151×108                         |
| GM1 <sup>30%B</sup>      | 30    | 293  | 240          | 560    | 1          | 258,376 | 147×147×112                         |
| GM1 <sup>10%B-330K</sup> | 10    | 330  | 80           | 720    | 1          | 260,960 | 156×156×102                         |
| GM1 <sup>20%B-330K</sup> | 20    | 330  | 160          | 640    | 1          | 260,640 | 150×150×110                         |
| GM1 <sup>30%B-330K</sup> | 30    | 330  | 240          | 560    | 1          | 258,376 | 147×147×112                         |

**Table S2:** RMSD ( $\text{\AA}$ ) comparison of representative conformations of top three clusters obtained from systems GM1<sup>10%</sup>, GM1<sup>20%</sup>, and GM1<sup>30%</sup>. All GM1 represents comparison of RMSD of top three clusters from all three concentrations.

| <b>System</b>      | <b>MD clusters</b> | <b>Clust-1</b> | <b>Clust-2</b> | <b>Clust-3</b> |
|--------------------|--------------------|----------------|----------------|----------------|
| GM1 <sup>10%</sup> | <b>Clust-1</b>     | 0              | 0.850          | 0.853          |
|                    | <b>Clust-2</b>     |                |                | 1.182          |
| GM1 <sup>20%</sup> | <b>Clust-1</b>     | 0              | 0.862          | 0.956          |
|                    | <b>Clust-2</b>     |                |                | 1.33           |
| GM1 <sup>30%</sup> | <b>Clust-1</b>     | 0              | 0.910          | 0.868          |
|                    | <b>Clust-2</b>     |                |                | 1.217          |
| <b>All GM1</b>     | <b>Clust-1</b>     | 0              | 0.910          | 0.908          |
|                    | <b>Clust-2</b>     |                |                | 1.202          |

**Table S3:** RMSD ( $\text{\AA}$ ) comparison of representative conformations of top three clusters obtained from systems GM1<sup>10%</sup>, GM1<sup>20%</sup>, and GM1<sup>30%</sup> with crystal structures of GM1 in PDB. All GM1 represents comparison of RMSD of top three clusters from all three concentrations with crystal structures of GM1 in PDB.

| System             | MD Clusters    | Crystal structures |       |       |       |       |       |       |
|--------------------|----------------|--------------------|-------|-------|-------|-------|-------|-------|
|                    |                | 3chb               | 3bwr  | 3ayc  | 2xrq  | 4l6t  | 3m3q  | 1ct1  |
| GM1 <sup>10%</sup> | <b>Clust-1</b> | 0.909              | 1.300 | 0.932 | 0.947 | 0.903 | 0.978 | 1.267 |
|                    | <b>Clust-2</b> | 1.327              | 1.623 | 1.109 | 1.318 | 1.251 | 1.311 | 1.477 |
|                    | <b>Clust-3</b> | 1.226              | 1.067 | 1.265 | 1.187 | 1.216 | 1.269 | 1.200 |
| GM1 <sup>20%</sup> | <b>Clust-1</b> | 0.934              | 1.324 | 0.938 | 0.971 | 0.924 | 1.029 | 1.227 |
|                    | <b>Clust-2</b> | 1.390              | 1.665 | 1.142 | 1.376 | 1.305 | 1.355 | 1.516 |
|                    | <b>Clust-3</b> | 1.244              | 0.988 | 1.277 | 1.200 | 1.236 | 1.261 | 1.239 |
| GM1 <sup>30%</sup> | <b>Clust-1</b> | 0.865              | 1.269 | 0.923 | 0.921 | 0.877 | 0.950 | 1.240 |
|                    | <b>Clust-2</b> | 1.327              | 1.623 | 1.125 | 1.320 | 1.257 | 1.318 | 1.457 |
|                    | <b>Clust-3</b> | 1.189              | 1.060 | 1.211 | 1.147 | 1.179 | 1.243 | 1.176 |
| <b>All GM1</b>     | <b>Clust-1</b> | 0.865              | 1.269 | 0.923 | 0.921 | 0.877 | 0.950 | 1.240 |
|                    | <b>Clust-2</b> | 1.327              | 1.623 | 1.125 | 1.320 | 1.257 | 1.318 | 1.457 |
|                    | <b>Clust-3</b> | 1.191              | 0.974 | 1.264 | 1.147 | 1.184 | 1.240 | 1.178 |

**Table S4:** Effective proton-proton distances (Å) calculated for systems GM1<sup>10%</sup>, GM1<sup>20%</sup>, and GM1<sup>30%</sup> from MD simulations. For comparison purpose NMR experimental intra- and inter-residue NOE distances for GM1-modified micelles and GM1 in DMSO are given (See Ref. 64 and 65). Average proton-proton distances obtained from seven crystal structures of GM1 oligosaccharides are also given.

| Proton-proton distances |           | NMR experiment      |             | MD systems         |                    |                    | Crystal Avg. |
|-------------------------|-----------|---------------------|-------------|--------------------|--------------------|--------------------|--------------|
|                         |           | GM1-acetyl micelles | GM1 in DMSO | GM1 <sup>10%</sup> | GM1 <sup>20%</sup> | GM1 <sup>30%</sup> |              |
| Gal2-H1                 | GalNAc-H2 | 3.0 ± 0.3           | 3.5 ± 0.4   | 4.18 ± 0.23        | 4.18 ± 0.23        | 4.18 ± 0.23        | 4.23 ± 0.16  |
| Gal2-H1                 | GalNAc-H3 |                     | 2.5 ± 0.3   | 2.26 ± 0.18        | 2.26 ± 0.18        | 2.26 ± 0.18        | 2.19 ± 0.15  |
| Gal2-H1                 | GalNAc-HN | 3.0 ± 0.3           | 3.5 ± 0.4   | 3.11 ± 0.66        | 3.08 ± 0.65        | 3.09 ± 0.65        | 3.38 ± 0.52  |
| Neu5Ac-HO8              | Neu5Ac-H6 | 2.2 ± 0.2           | 2.4 ± 0.2   | 2.61 ± 0.79        | 2.59 ± 0.78        | 2.58 ± 0.77        | 2.04 ± 0.08  |
| Neu5Ac-H8               | GalNAc-H1 |                     | 3.1 ± 0.3   | 5.55 ± 1.24        | 5.12 ± 1.41        | 4.93 ± 1.51        | 2.38 ± 0.29  |
| Neu5Ac-HO8              | GalNAc-H1 | 2.9 ± 0.3           | 2.6 ± 0.3   | 3.78 ± 1.96        | 3.54 ± 2.07        | 3.39 ± 2.13        | 2.69 ± 0.22  |
| Neu5Ac-H32              | Gal1-H3   | 2.4 ± 0.2           |             | 2.94 ± 0.70        | 2.77 ± 0.82        | 2.64 ± 0.90        | 2.01 ± 0.09  |
| Neu5Ac-H32              | Gal1-HO2  | 3.4 ± 0.3           | 3.2 ± 0.3   | 2.97 ± 0.56        | 2.96 ± 0.58        | 2.92 ± 0.55        | 3.19 ± 0.30  |
| GalNAc-HN               | GalNAc-H2 | 2.5 ± 0.3           | 2.6 ± 0.3   | 2.58 ± 0.33        | 2.61 ± 0.31        | 2.61 ± 0.32        | 2.97 ± 0.01  |
| GalNAc-HN               | Gal1-H2   | 3.4 ± 0.3           | 3.6 ± 0.4   | 3.29 ± 0.56        | 3.30 ± 0.56        | 3.29 ± 0.55        | 3.91 ± 0.54  |
| GalNAc-H1               | Gal1-H4   | 2.4 ± 0.2           | 2.2 ± 0.2   | 2.29 ± 0.20        | 2.29 ± 0.20        | 2.29 ± 0.21        | 2.11 ± 0.13  |
| Gal1-HO2                | Glc-H61   |                     | 3.6 ± 0.4   | 3.54 ± 1.07        | 3.50 ± 1.08        | 3.46 ± 1.07        | 4.27 ± 1.47  |
| Gal1-HO2                | Glc-H62   |                     | 3.4 ± 0.3   | 3.70 ± 1.00        | 3.63 ± 1.01        | 3.63 ± 1.00        | 4.97 ± 0.72  |
| Gal1-H1                 | Glc-HO3   |                     | 3.5 ± 0.4   | 3.25 ± 0.64        | 3.25 ± 0.64        | 3.23 ± 0.65        | 3.41 ± 0.64  |
| Gal1-H1                 | Glc-HO6   |                     | >4          | 3.52 ± 1.06        | 3.50 ± 1.06        | 3.49 ± 1.07        | 3.90 ± 0.59  |

**Table S5:** Intra- and inter-residue hydrogen bond occupancies and their standard errors for all systems obtained from MD simulations.

| <b>Donor-Acceptor Pairs</b>       | <b>GM1<sup>10%</sup></b> | <b>GM1<sup>20%</sup></b> | <b>GM1<sup>30%</sup></b> |
|-----------------------------------|--------------------------|--------------------------|--------------------------|
| <b>CER--POPC</b>                  |                          |                          |                          |
| <b>OH--O</b>                      | 2.4 ± 0.3                | 2 ± 0.4                  | 1.6 ± 0.2                |
| <b>NH--O</b>                      | 41 ± 1.6                 | 42.4 ± 1.1               | 39.9 ± 1.4               |
| <b>CER--CER</b>                   |                          |                          |                          |
| <b>OH--O</b>                      | 1.2 ± 0.4                | 1.1 ± 0.4                | 1.6 ± 0.2                |
| <b>NH--O</b>                      | 10.8 ± 2.6               | 15.8 ± 3.1               | 26 ± 2.5                 |
| <b>CARB--POPC</b>                 |                          |                          |                          |
| <b>Glc-POPC</b>                   | 20.9 ± 0.5               | 19.3 ± 0.3               | 18 ± 0.3                 |
| <b>Gal1-POPC</b>                  | 5.8 ± 0.3                | 6.5 ± 0.2                | 7.1 ± 0.4                |
| <b>GalNAc-POPC</b>                | 0.8 ± 0.1                | 0.9 ± 0.1                | 1.3 ± 0.2                |
| <b>Gal2-POPC</b>                  | 1.3 ± 0.1                | 1.3 ± 0.2                | 2.1 ± 0.3                |
| <b>Neu5Ac-POPC</b>                | 3.6 ± 0.1                | 3.9 ± 0.2                | 4.5 ± 0.2                |
| <b>CARB--CER</b>                  |                          |                          |                          |
| <b>Glc-CER</b>                    | 14.8 ± 0.3               | 14.9 ± 0.6               | 15.6 ± 0.6               |
| <b>Gal1-CER</b>                   | 0 ± 0.0                  | 0.1 ± 0.0                | 1.2 ± 0.2                |
| <b>GalNAc-CER</b>                 | 0 ± 0.0                  | 0.3 ± 0.1                | 0 ± 0.0                  |
| <b>Gal2-CER</b>                   | 0.8 ± 0.3                | 0.1 ± 0.0                | 1 ± 0.3                  |
| <b>Neu5Ac-CER</b>                 | 0.3 ± 0.1                | 0.6 ± 0.2                | 0.5 ± 0.1                |
| <b>CARB--CARB (Inter segment)</b> |                          |                          |                          |
| <b>Glc-CARB</b>                   | 0.8 ± 0.1                | 2.3 ± 0.2                | 3.6 ± 0.2                |
| <b>Gal1-CARB</b>                  | 1.7 ± 0.5                | 3.5 ± 0.2                | 5.9 ± 0.2                |
| <b>GalNAc-CARB</b>                | 1.5 ± 0.1                | 3.6 ± 0.2                | 6.1 ± 0.3                |
| <b>Gal2-CARB</b>                  | 1.9 ± 0.1                | 3.9 ± 0.1                | 6.5 ± 0.1                |
| <b>Neu5Ac-CARB</b>                | 2.8 ± 0.4                | 6.6 ± 0.1                | 10.4 ± 0.3               |
| <b>CARB--CARB (Intra segment)</b> |                          |                          |                          |
| <b>Glc-CARB</b>                   | 9.1 ± 0.2                | 10.2 ± 0.3               | 11.7 ± 0.2               |
| <b>Gal1-CARB</b>                  | 27.7 ± 0.3               | 28.6 ± 0.3               | 30.2 ± 0.4               |
| <b>GalNAc-CARB</b>                | 10.8 ± 0.3               | 13.6 ± 0.3               | 16.3 ± 0.4               |
| <b>Gal2-CARB</b>                  | 4.2 ± 0.1                | 6.4 ± 0.1                | 9 ± 0.1                  |
| <b>Neu5Ac-CARB</b>                | 25.9 ± 0.3               | 29.9 ± 0.2               | 33.8 ± 0.4               |

**Table S6:** Average bilayer thickness  $d_H$  (Å) of ordered and disordered bilayer regions for larger systems.<sup>a</sup> The bilayer regions are categorized into three classes based on the local bilayer properties from a pair of the nearest neighboring lipids in top and bottom leaflets (see Methods): ordered (both lipids from ordered lipid clusters), intermediate (only one lipid from ordered lipid cluster), and disordered (none of them from the ordered lipid clusters).

| System                   | Ordered    | Intermediate | Disordered |
|--------------------------|------------|--------------|------------|
| GM1 <sup>10%B</sup>      | 32.1 ± 0.1 | 30.2 ± 0.1   | 28.3 ± 0.0 |
| GM1 <sup>20%B</sup>      | 34.9 ± 0.1 | 31.2 ± 0.1   | 27.6 ± 0.1 |
| GM1 <sup>30%B</sup>      | 36.5 ± 0.1 | 30.9 ± 0.1   | 25.5 ± 0.1 |
| GM1 <sup>10%B-330K</sup> | 29.2 ± 0.2 | 28.5 ± 0.1   | 27.7 ± 0.0 |
| GM1 <sup>20%B-330K</sup> | 30.0 ± 0.1 | 29.0 ± 0.0   | 28.2 ± 0.0 |
| GM1 <sup>30%B-330K</sup> | 30.2 ± 0.1 | 29.2 ± 0.0   | 28.3 ± 0.0 |

<sup>a</sup>Average  $d_H$  and its standard error (numbers in parenthesis) are calculated over six 50-ns blocks for GM1<sup>10%B</sup>, four 50-ns blocks for GM1<sup>20%B</sup>, two 50-ns blocks for GM1<sup>30%B</sup>, and three 50-ns blocks for GM1<sup>10%B-330K</sup>, GM1<sup>20%-330K</sup>, and GM1<sup>30%-330K</sup>.

## FIGURES

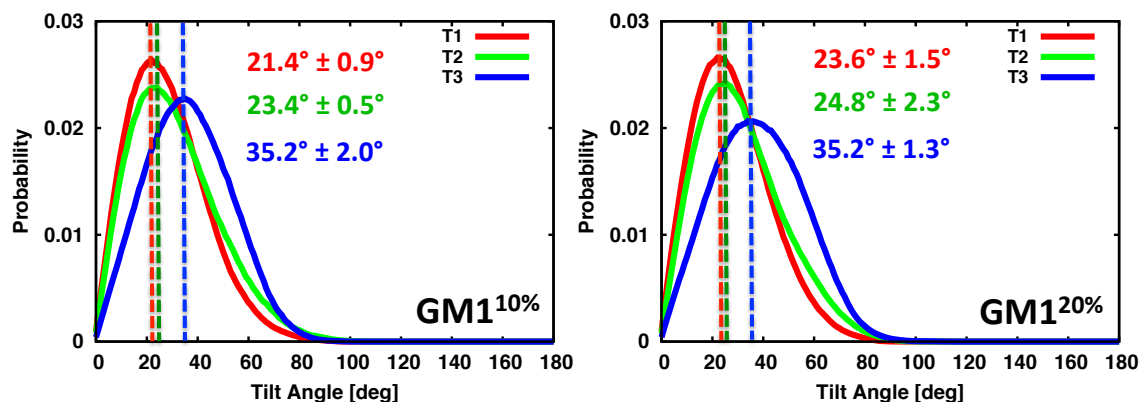

**Figure S1:** Tilt angle distributions in GM1<sup>10%</sup> and GM1<sup>20%</sup> with the peak tilt angles. T1 is a vector from the C1 carbon of residue Glc and the C4 carbon of GalNAc, T2 a vector from the C1 carbon of residue Glc and the C4 carbon of residue Gal2, and T3 a vector from C1 carbon of residue Glc and the C5 carbon of residue Neu5Ac.



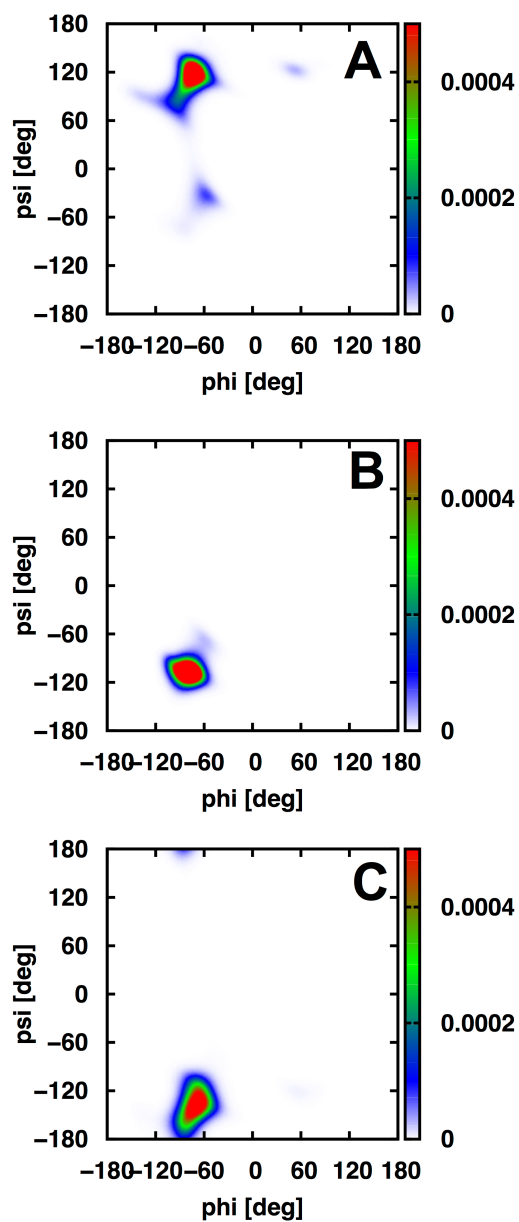

**Figure S2:** (A)  $\beta$ -Gal-(1 $\rightarrow$ 4)- $\beta$ -Glc ( $\phi_1/\psi_1$ ), (B)  $\beta$ -GalNAc-(1 $\rightarrow$ 4)- $\beta$ -Gal ( $\phi_2/\psi_2$ ), and (C)  $\beta$ -Gal-(1 $\rightarrow$ 3)- $\beta$ -GalNAc ( $\phi_3/\psi_3$ ) torsion distribution of GM1 oligosaccharide in GM1<sup>30%</sup>.

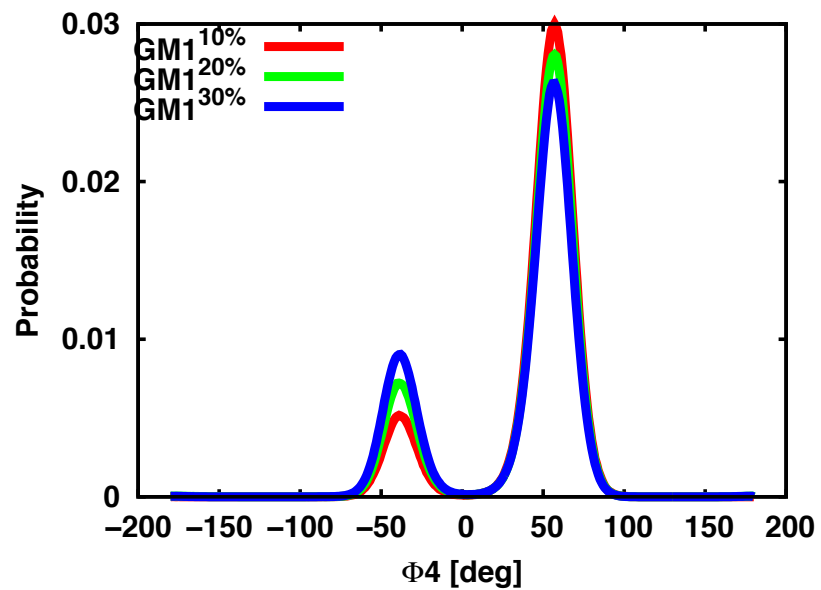

**Figure S3:**  $\phi_4$  torsion angles distribution of GM1 oligosaccharide in GM1<sup>10%</sup>, GM1<sup>20%</sup>, and GM1<sup>30%</sup>.

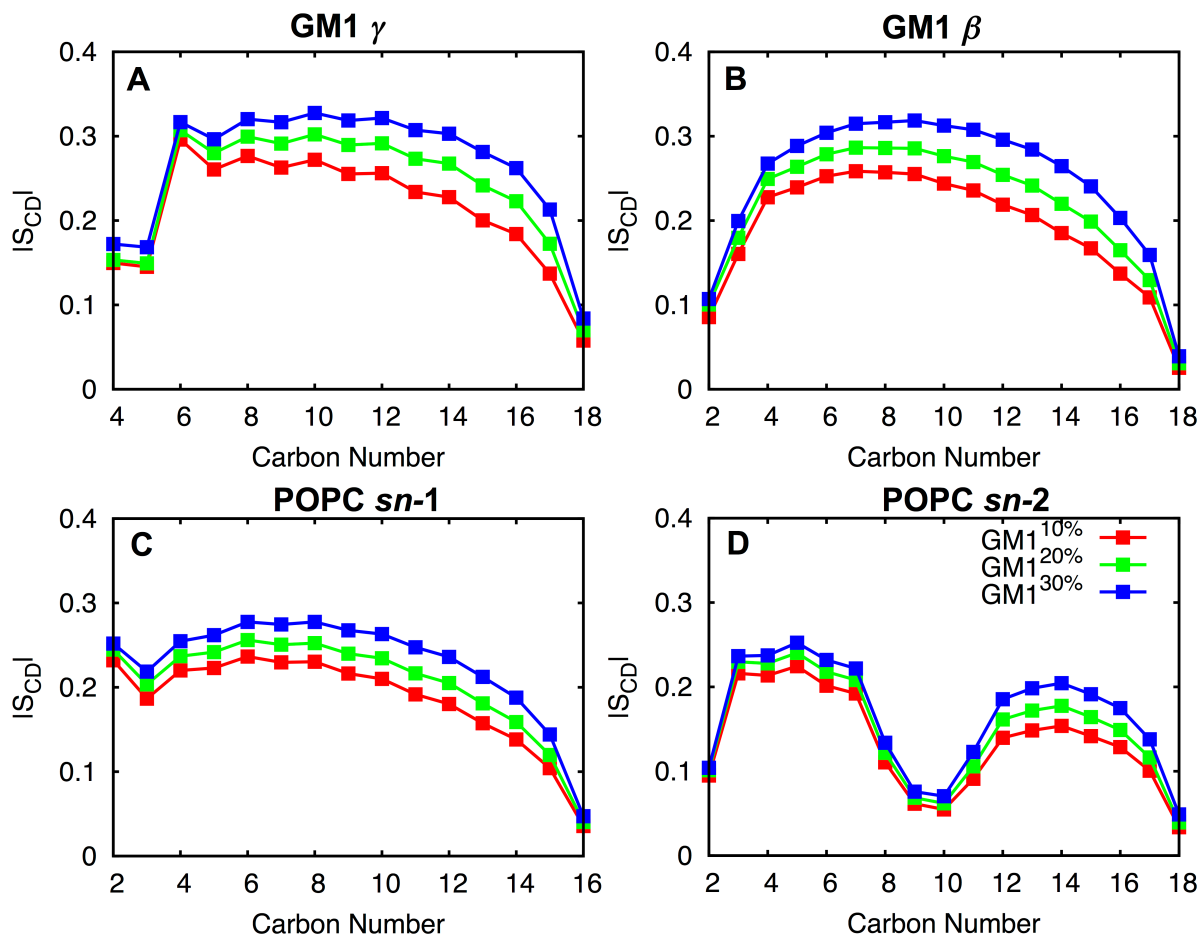

**Figure S4:** (A and B) The calculated GM1  $\gamma$  and  $\beta$  chain order parameters and (C and D) POPC  $sn-1$  and  $sn-2$  chain order parameters in GM1<sup>10%</sup>, GM1<sup>20%</sup>, and GM1<sup>30%</sup>. The color ticks for all systems are given in (D).

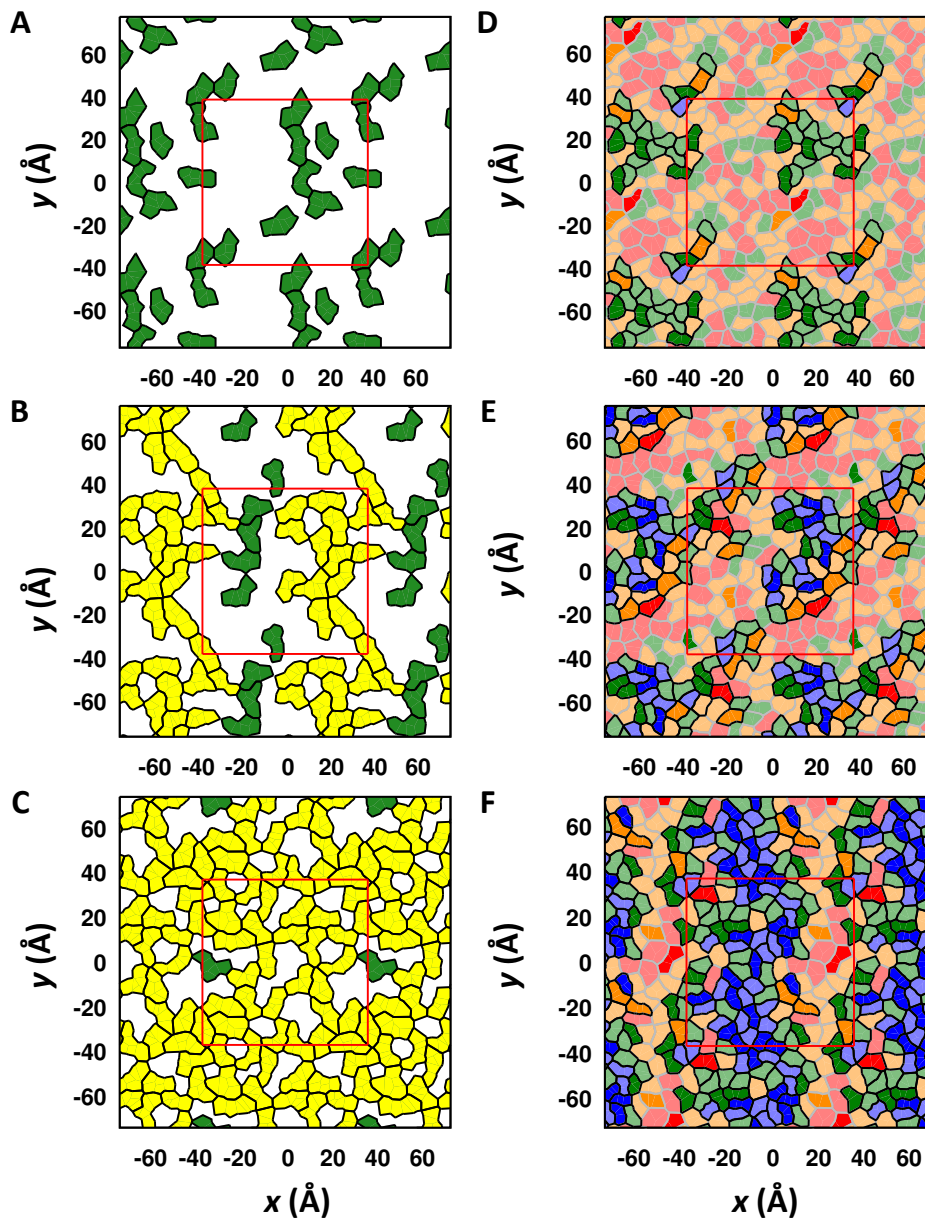

**Figure S5:** (A-C) Snapshots of carbohydrate clusters in (A) GM1<sup>10%</sup>, (B) GM1<sup>20%</sup>, and (C) GM1<sup>30%</sup>. Finite-sized carbohydrate clusters are shown in green and percolated one is shown in yellow, where five monosaccharides from the same GM1 are enclosed by black border. (D-F) Snapshots of ordered lipid clusters illustrating the spatial distribution of ordered lipids in (D) GM1<sup>10%</sup>, (E) GM1<sup>20%</sup>, and (F) GM1<sup>30%</sup>. The ordered states are mapped onto Voronoi tessellation of lipid tails with different colors: the highest (blue), upper-intermediate (green), lower-intermediate (orange), and the lowest ordered state (red). The POPC Voronoi regions are mapped with lighter color to distinguish from GM1 regions. The lipids in ordered-lipid clusters are enclosed by black border. The primary cell (simulation box) is indicated by a red box.

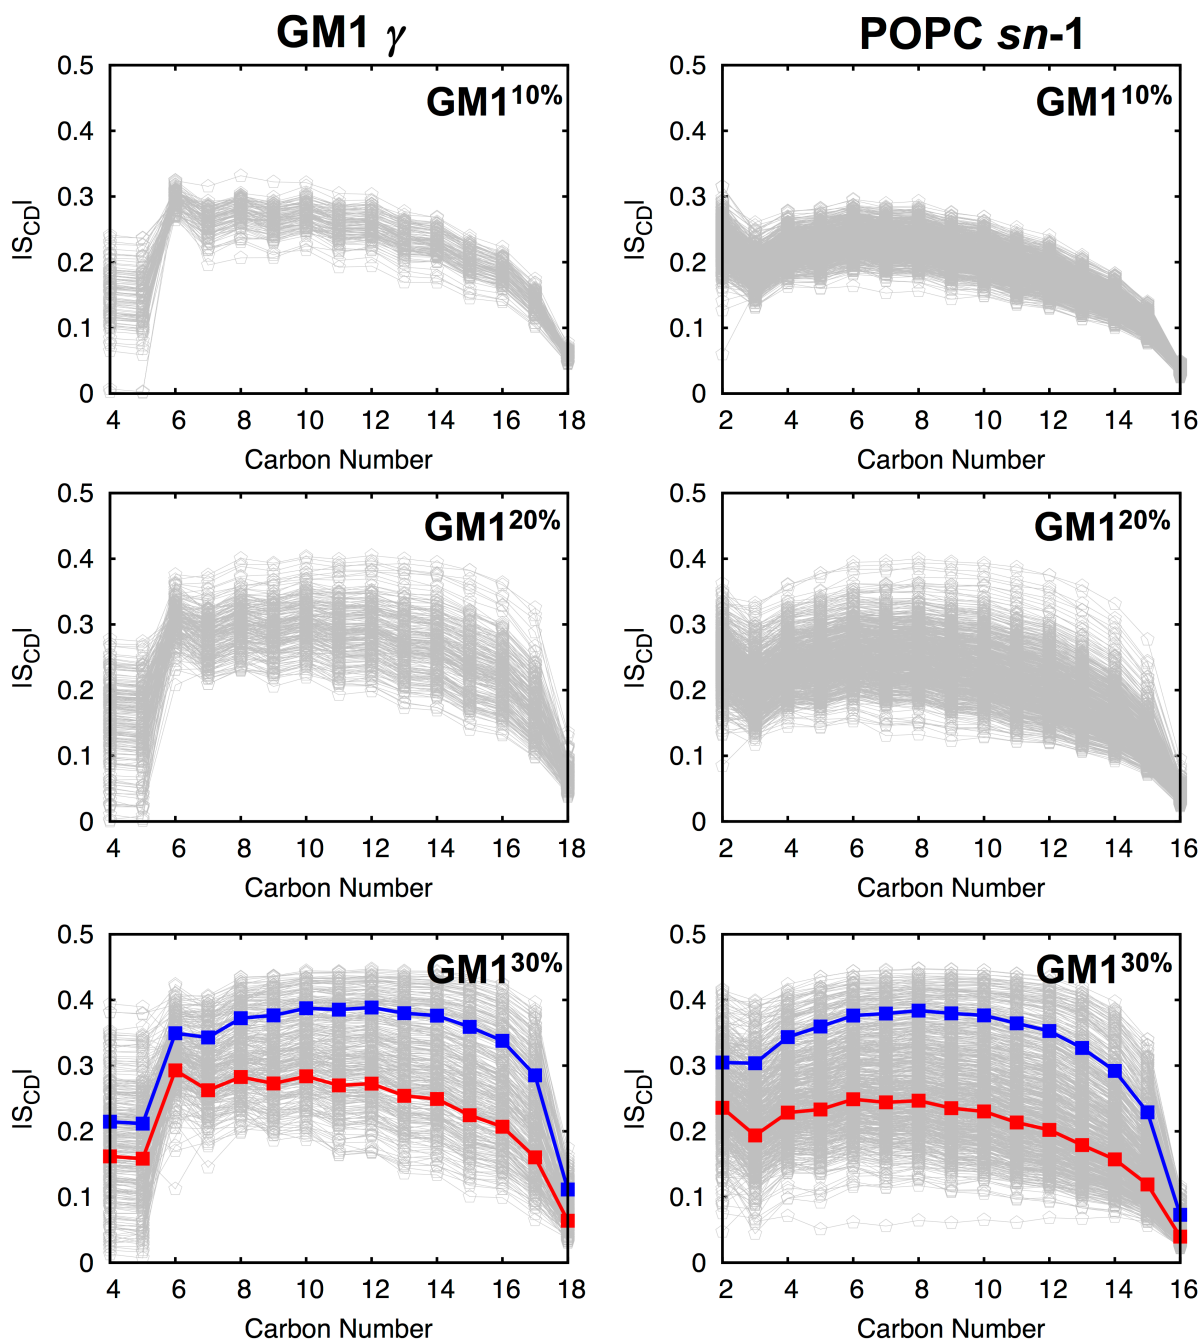

**Figure S6:** The overlay of the GM1  $\gamma$  and POPC  $sn-1$  chain order parameters in GM1<sup>10%</sup>, GM1<sup>20%</sup>, and GM1<sup>30%</sup> along with average chain order parameters for high ordered (blue) and low ordered (red) chains in GM1<sup>30%</sup>. The overlay of the GM1  $\beta$  and POPC  $sn-2$  chain order parameters shows same trend.

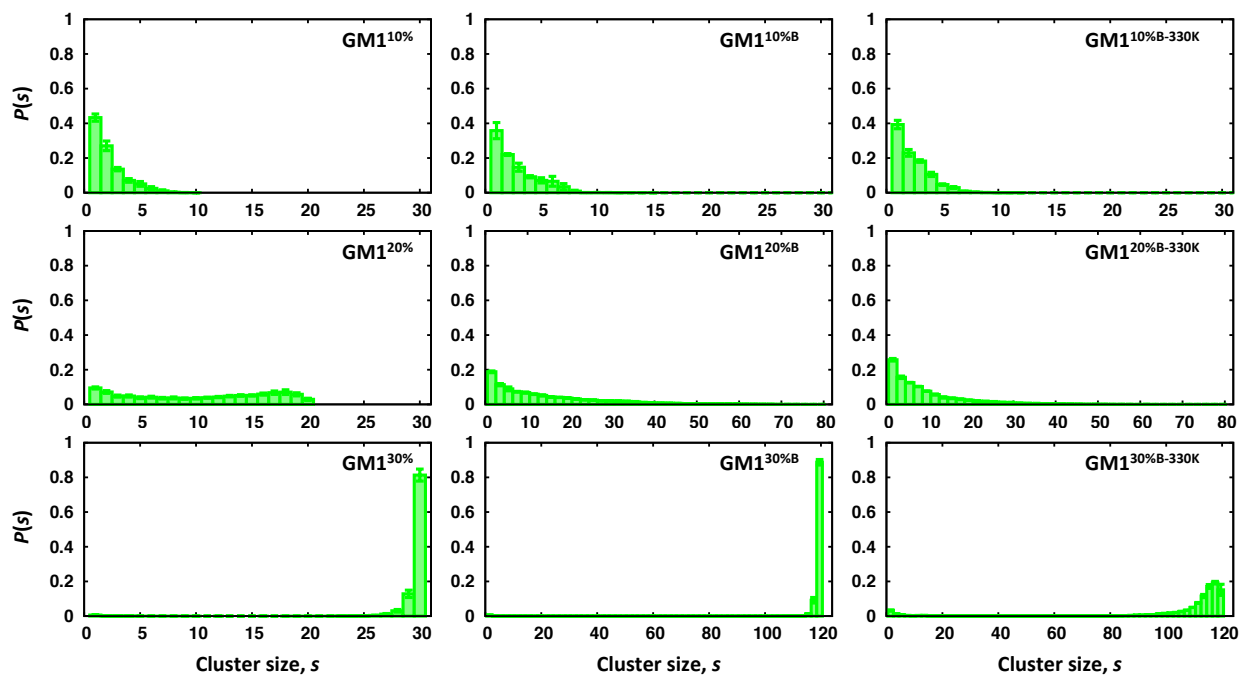

**Figure S7:** Probability that a GM1 belongs to a cluster of size  $s$ ,  $P(s)$ . The bin size is one for small systems (left panels) and those at 10% GM1 concentrations (top panels). For the other systems, the bin size is two.

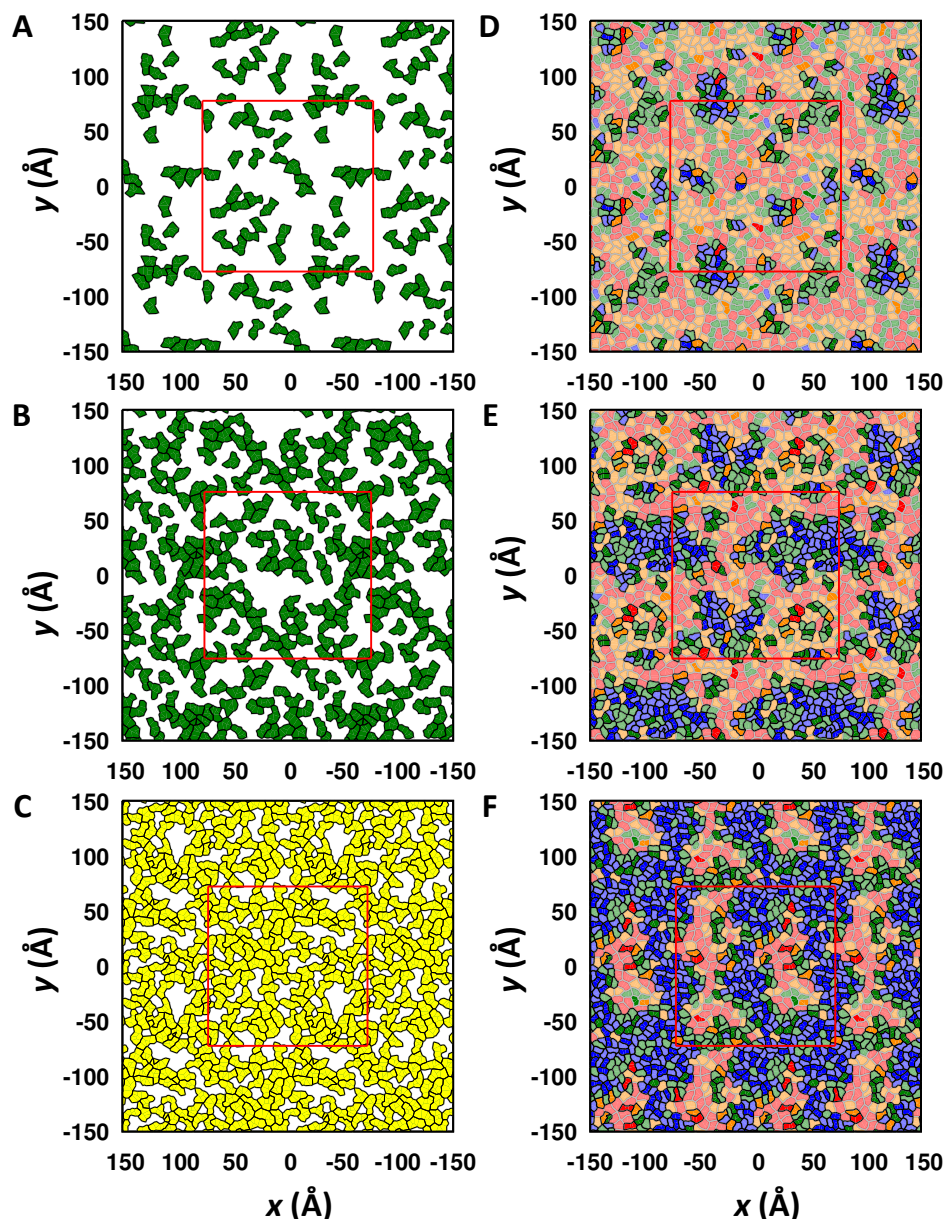

**Figure S8:** (A-C) Snapshots of carbohydrate clusters in (A) GM1<sup>10%B</sup>, (B) GM1<sup>20%B</sup>, and (C) GM1<sup>30%B</sup>. Finite-sized carbohydrate clusters are shown in green and percolated one is shown in yellow, where five monosaccharides from the same GM1 are enclosed by black border. (D-F) Snapshots of ordered lipid clusters illustrating the spatial distribution of ordered lipids in (D) GM1<sup>10%B</sup>, (E) GM1<sup>20%B</sup>, and (F) GM1<sup>30%B</sup>. The ordered states are mapped onto Voronoi tessellation of lipid tails with different colors: the highest (blue), upper-intermediate (green), lower-intermediate (orange), and the lowest ordered state (red). The POPC Voronoi regions are mapped with lighter color to distinguish from GM1 regions. The lipids in ordered-lipid clusters are enclosed by black border. The primary cell (simulation box) is indicated by a red box.

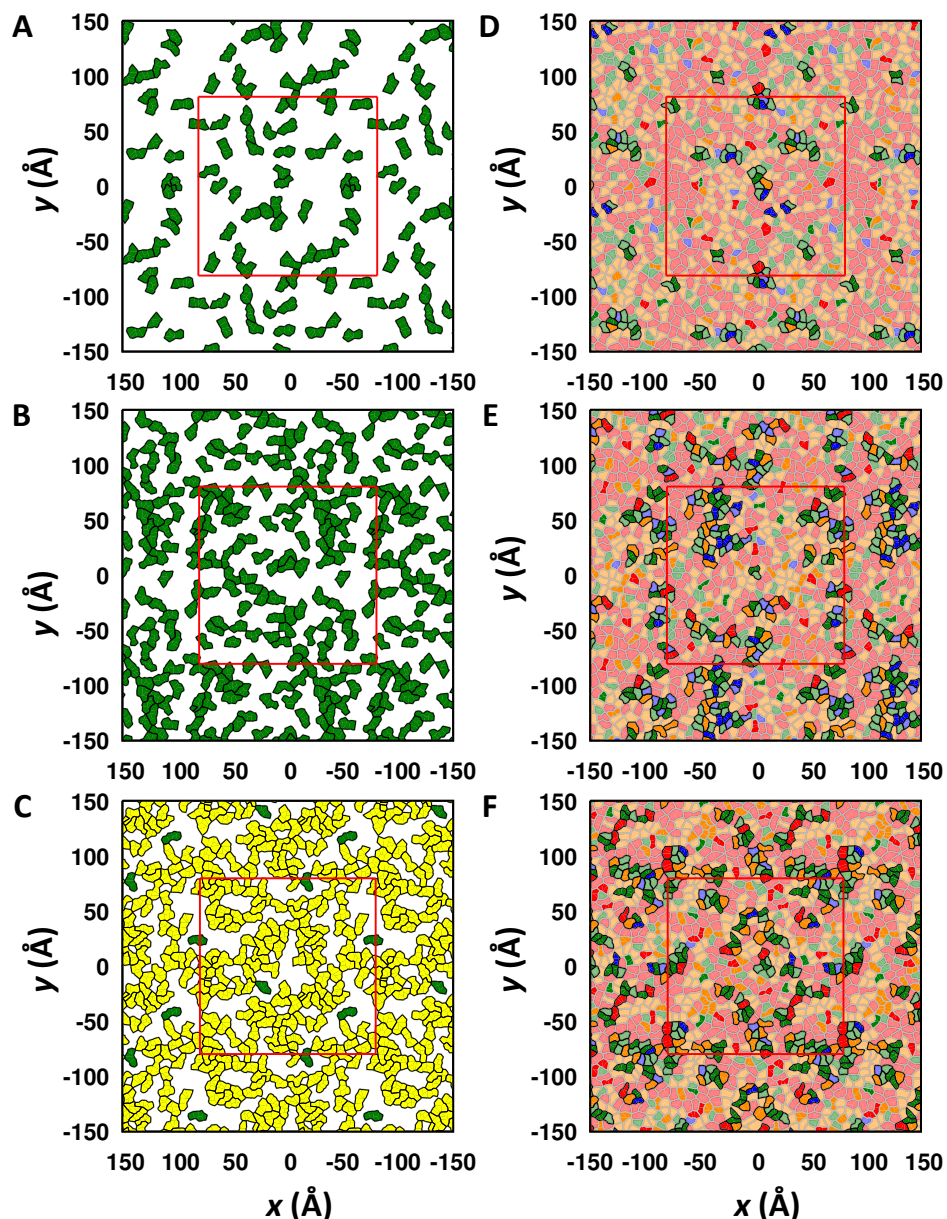

**Figure S9:** (A-C) Snapshots of carbohydrate clusters in (A) GM1<sup>10%B-330K</sup>, (B) GM1<sup>20%B-330K</sup>, and (C) GM1<sup>30%B-330K</sup>. Finite-sized carbohydrate clusters are shown in green and percolated one is shown in yellow, where five monosaccharides from the same GM1 are enclosed by black border. (D-F) Snapshots of ordered lipid clusters illustrating the spatial distribution of ordered lipids in (D) GM1<sup>10%B-330K</sup>, (E) GM1<sup>20%B-330K</sup>, and (F) GM1<sup>30%B-330K</sup>. The ordered states are mapped onto Voronoi tessellation of lipid tails with different colors: the highest (blue), upper-intermediate (green), lower-intermediate (orange), and the lowest ordered state (red). The POPC Voronoi regions are mapped with lighter color to distinguish from GM1 regions. The lipids in ordered-lipid clusters are enclosed by black border. The primary cell (simulation box) is indicated by a red box.
